# Supplementary material for: Establishment of an Immunocompetent Metastasis Rat Model with Hepatocyte Cancer Stem Cells
Source: MDPI journal article supplement (doi:10.3390/cancers12123721), 2020-12-11
Supplement: s1 [file s1]

# Supplementary Materials:

## Establishment of an Immunocompetent Metastasis Rat Model with Hepatocyte Cancer Stem Cells

Semon Wu <sup>1,\*</sup>, I-Chieh Tseng <sup>1</sup>, Wen-Cheng Huang <sup>2</sup>, Cheng-Wen Su <sup>2</sup>, Yu-Heng Lai <sup>3</sup>, Che Lin <sup>4</sup>, Alan Yueh-Luen Lee <sup>5</sup>, Chan-Yen Kuo <sup>6</sup>, Li-Yu Su <sup>6</sup>, Ming-Cheng Lee <sup>6</sup>, Te-Cheng Hsu <sup>7</sup> and Chun-Hsien Yu <sup>8,9,\*</sup>

Figure. S1

Tumorigenesis of cellular origins of HCC in F344 rat

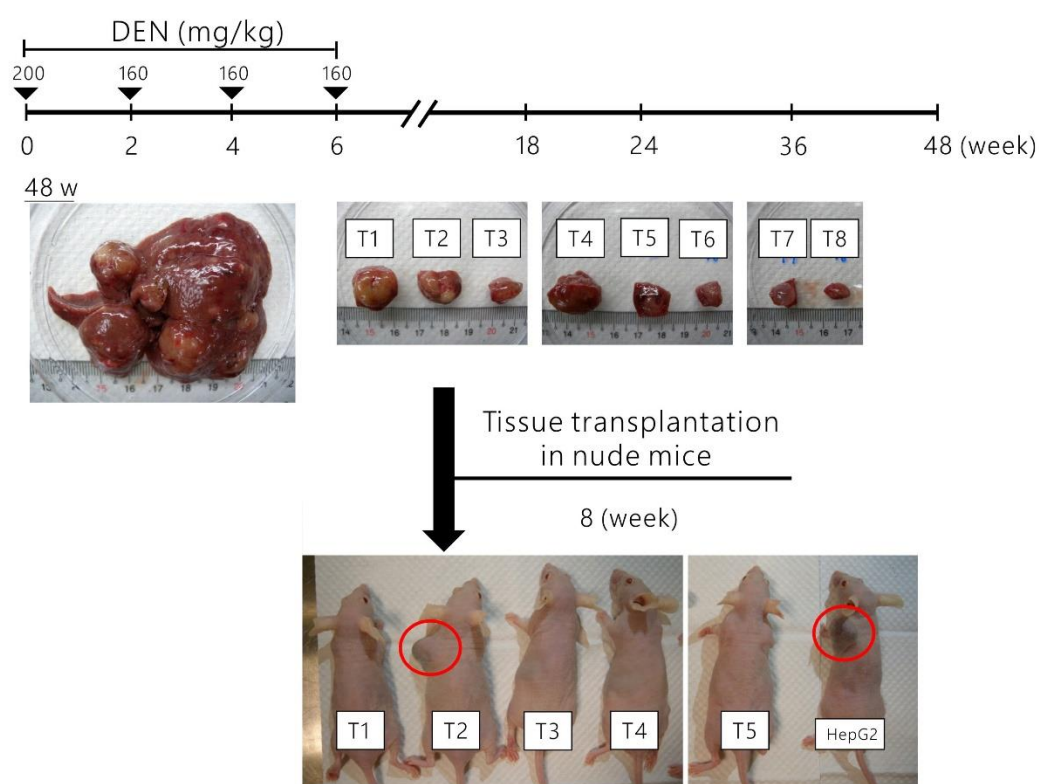

**Figure S1.** Tumorigenesis of various HCC originated from the DPPIV-deficient F344 rats. The scheme of DEN-induced HCC in DPPIV-deficient F344 rats was shown. The rats were sacrificed at different times after 6 weeks of DEN treatment. Tumors (T1-8) were isolated, measured, and xenografted into nude mice. Only T2 was successfully grown into a solid tumor after eight weeks. Mice injected with the liver cancer cell line HepG2 were used as control.

Figure S2.

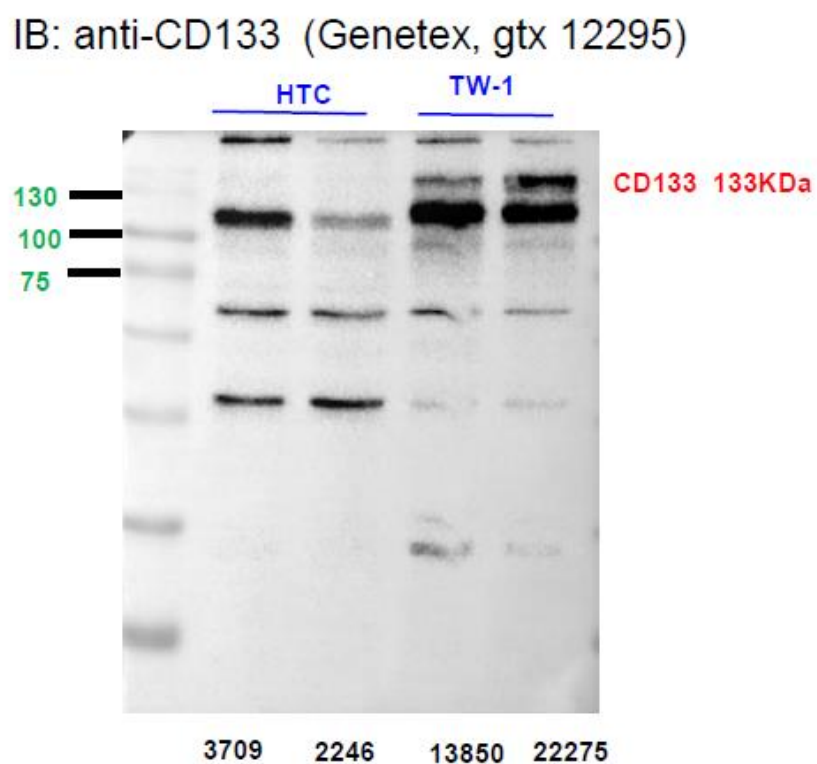

A. CD133

IB: anti-CK19 (Genetex, gtx 34651)

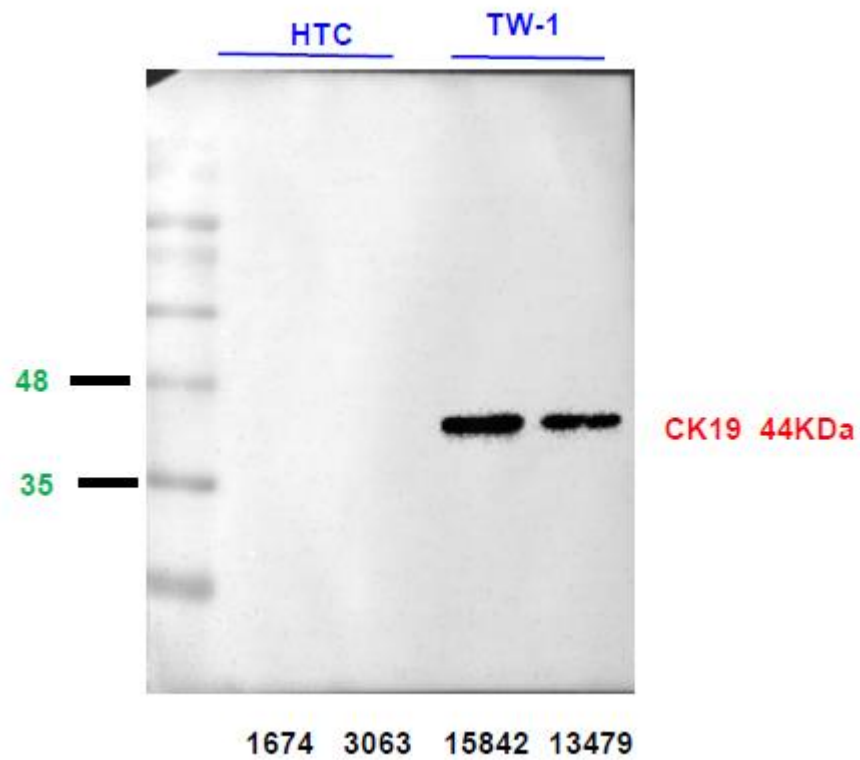

B. CK19

IB: anti-GSTP1 (Genetex, gtx 12695)

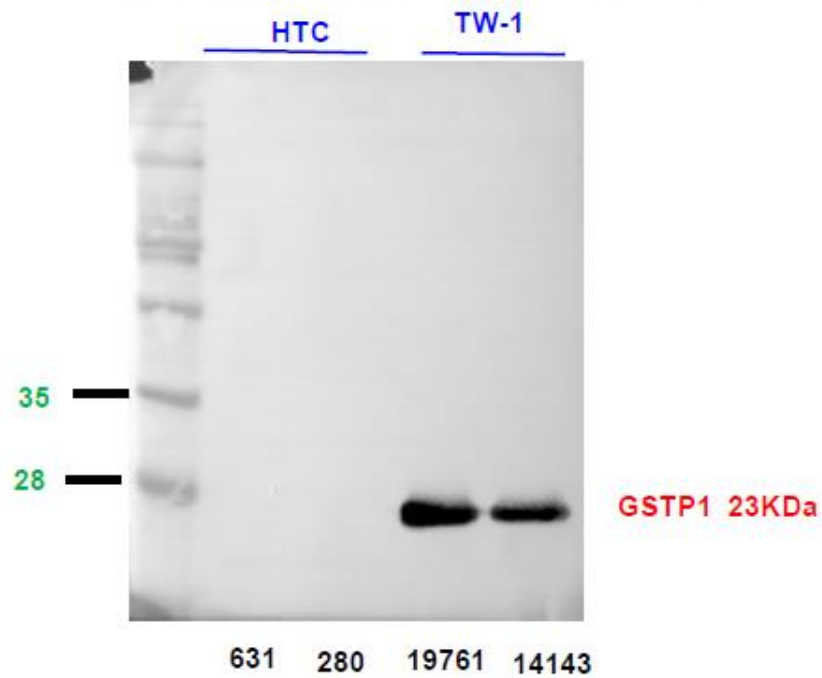

C. GSTP1

IB: anti-CD44 (Cell signaling, 37259S)

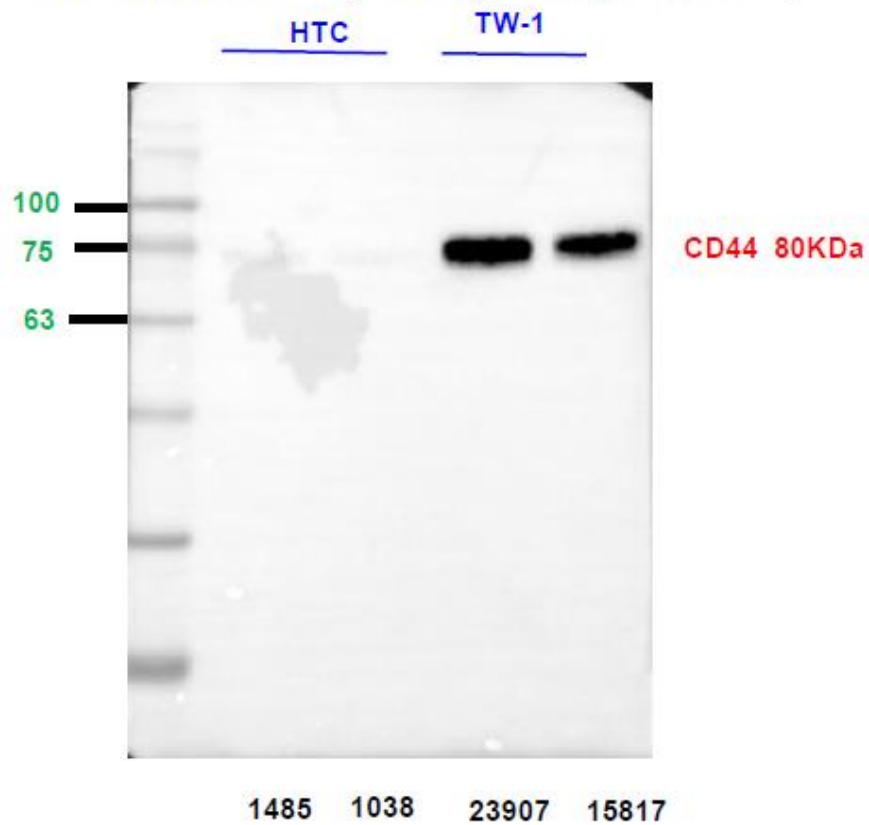

D. CD44

IB: anti-Epcam (Genetex, gtx 61060)

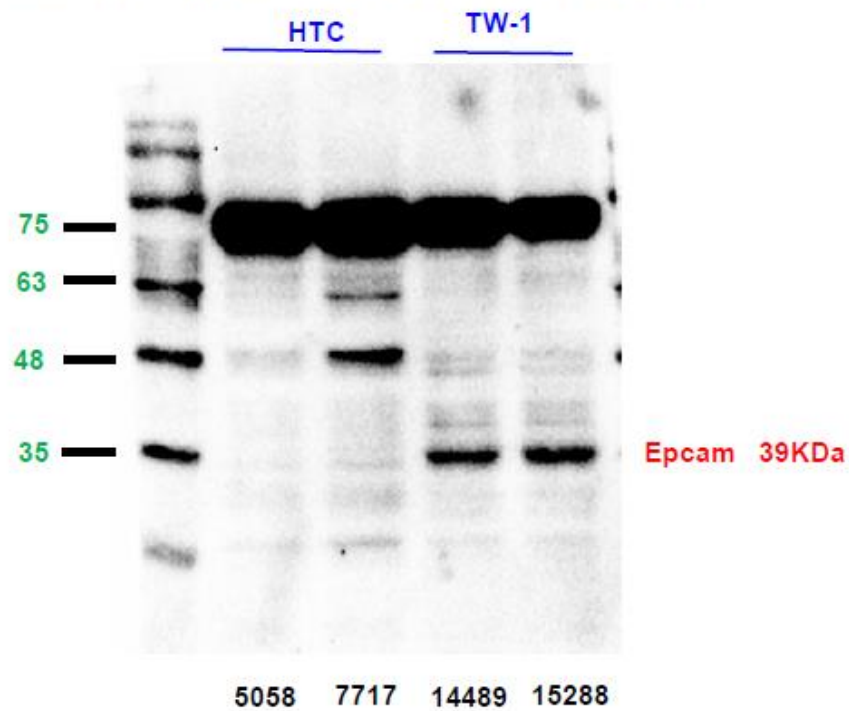

E. EpCAM

IB: anti-AFP (Genetex, gtx 30030)

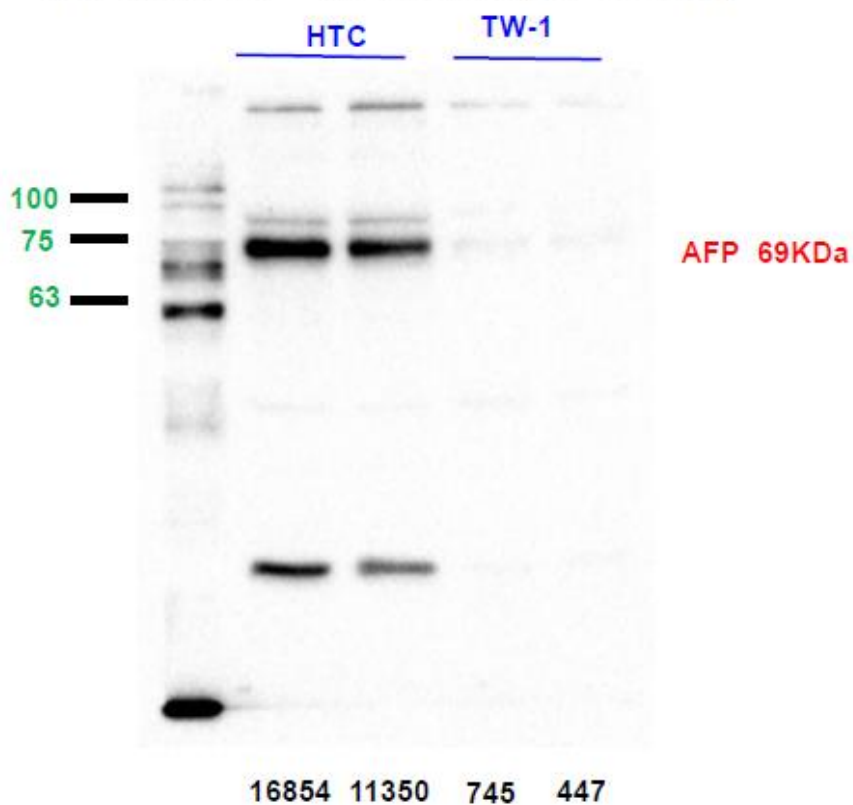

F. AFP

IB: anti-ALB (Genetex, gtx 102419)

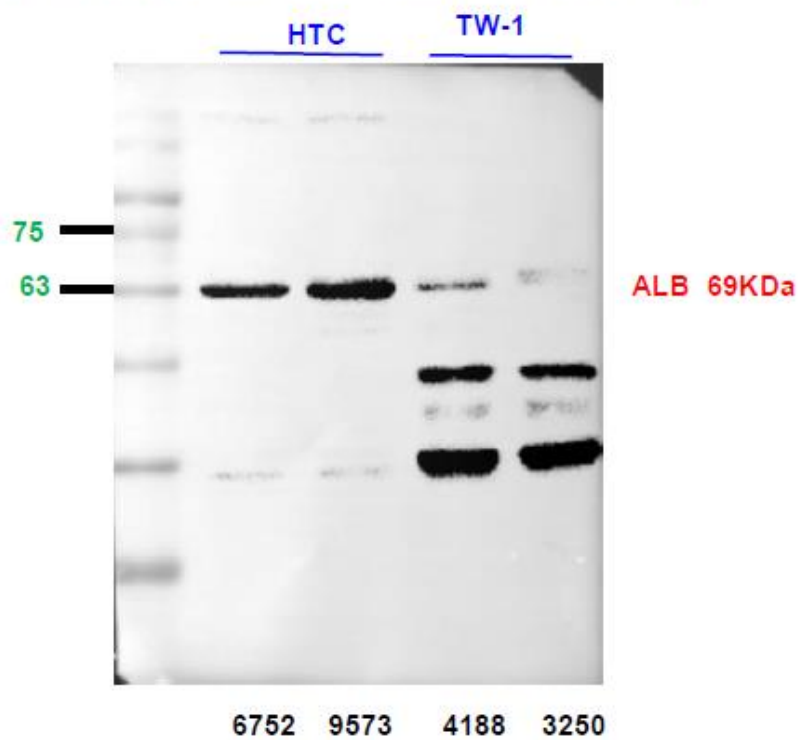

G. ALB

IB: anti-CD34 (Chemicon, CBL496)

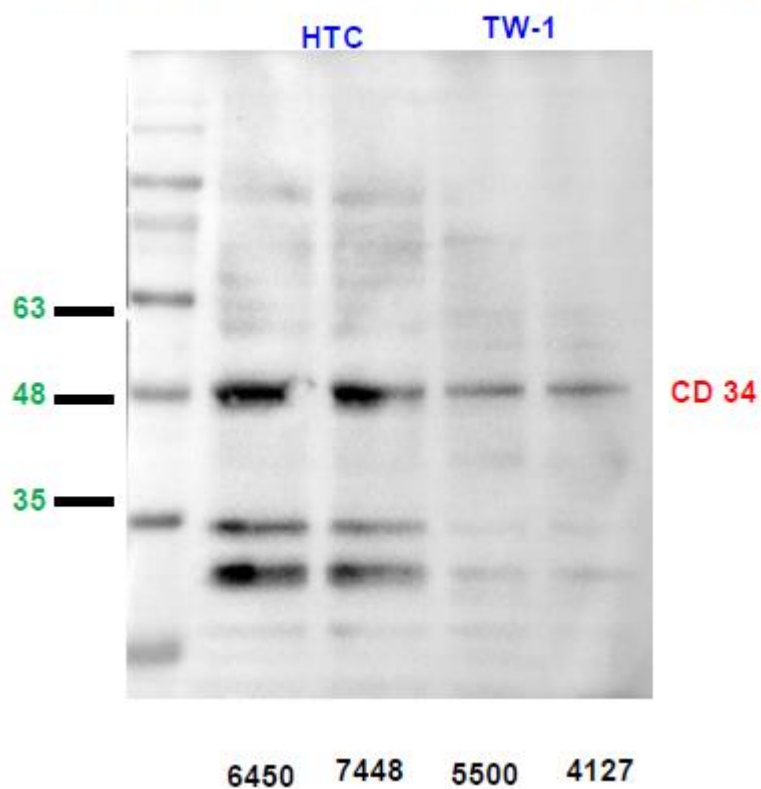

H. CD34

IB: anti-Actin (Santa, sc-47778)

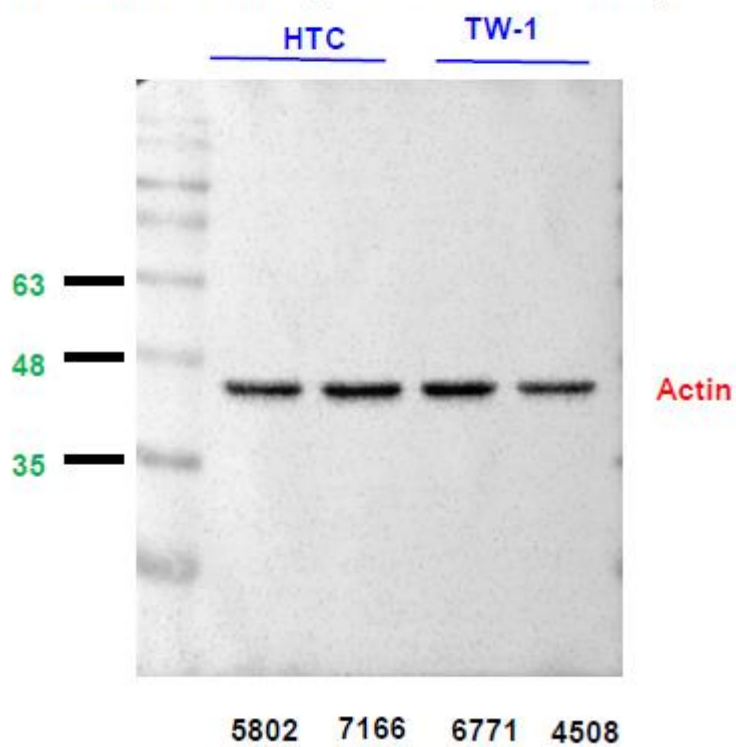

I. Actin

**Figure S2.** The original western blot pictures.

Figure S3.

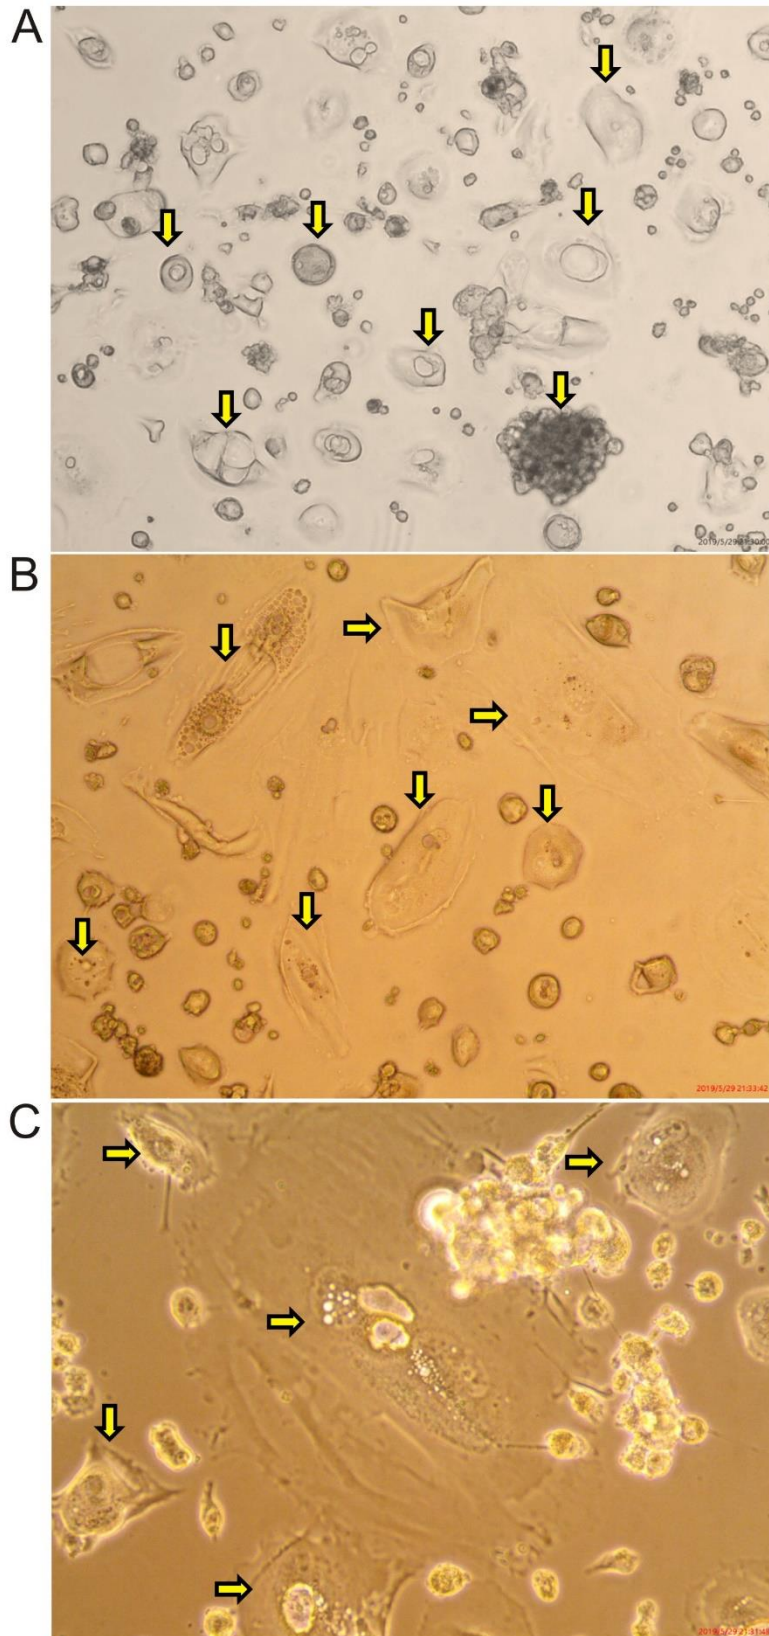

Figure S3. Various cell lineages were differentiated by TW-1 cells after cell

culture.

Figure. S4

A

Lymph node

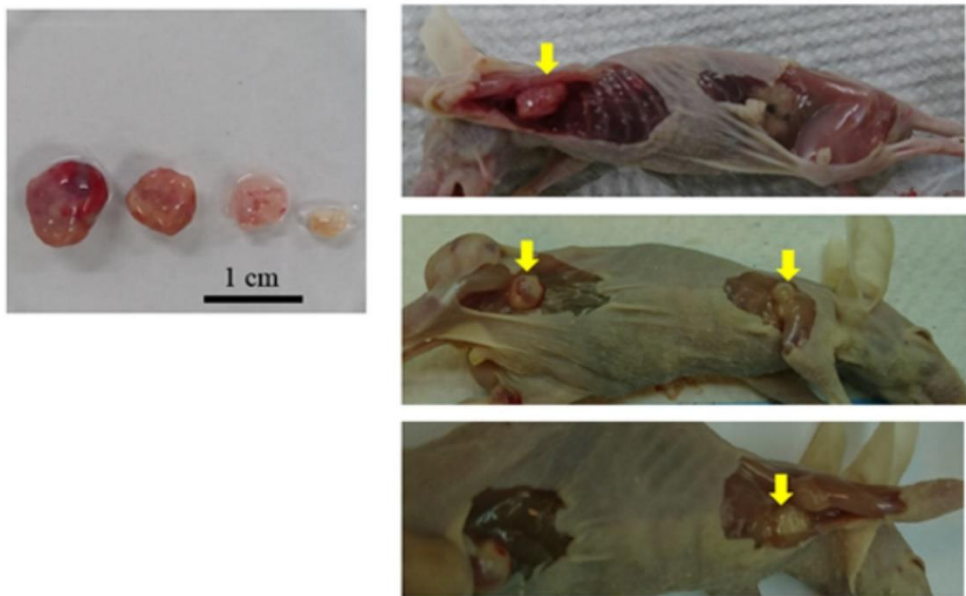

B

Lung (nude mice) Metastasis

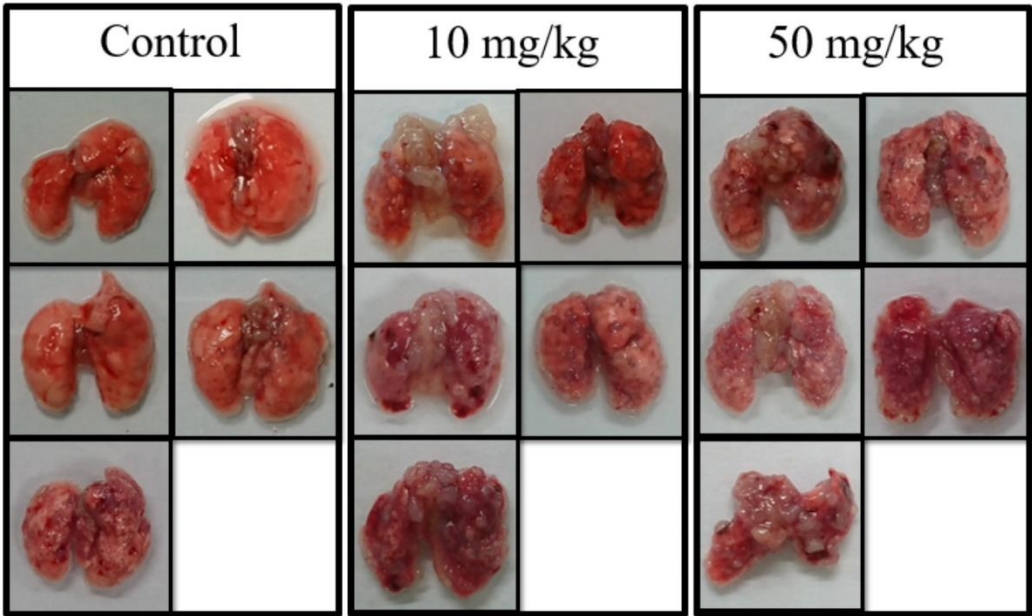

**Figure S4.** TW-1-derived tumors showed invasion in lymph nodes (A) and metastases to the lungs (B).
